# Supplementary material for: Compatibility of Automatic Transmission Fluids with Structural Polymers Used in Electrified Transmissions
Source: MDPI journal article supplement (doi:10.3390/app12073608), 2022-04-01
Supplement: s1 [file s1]

## Supplementary Information

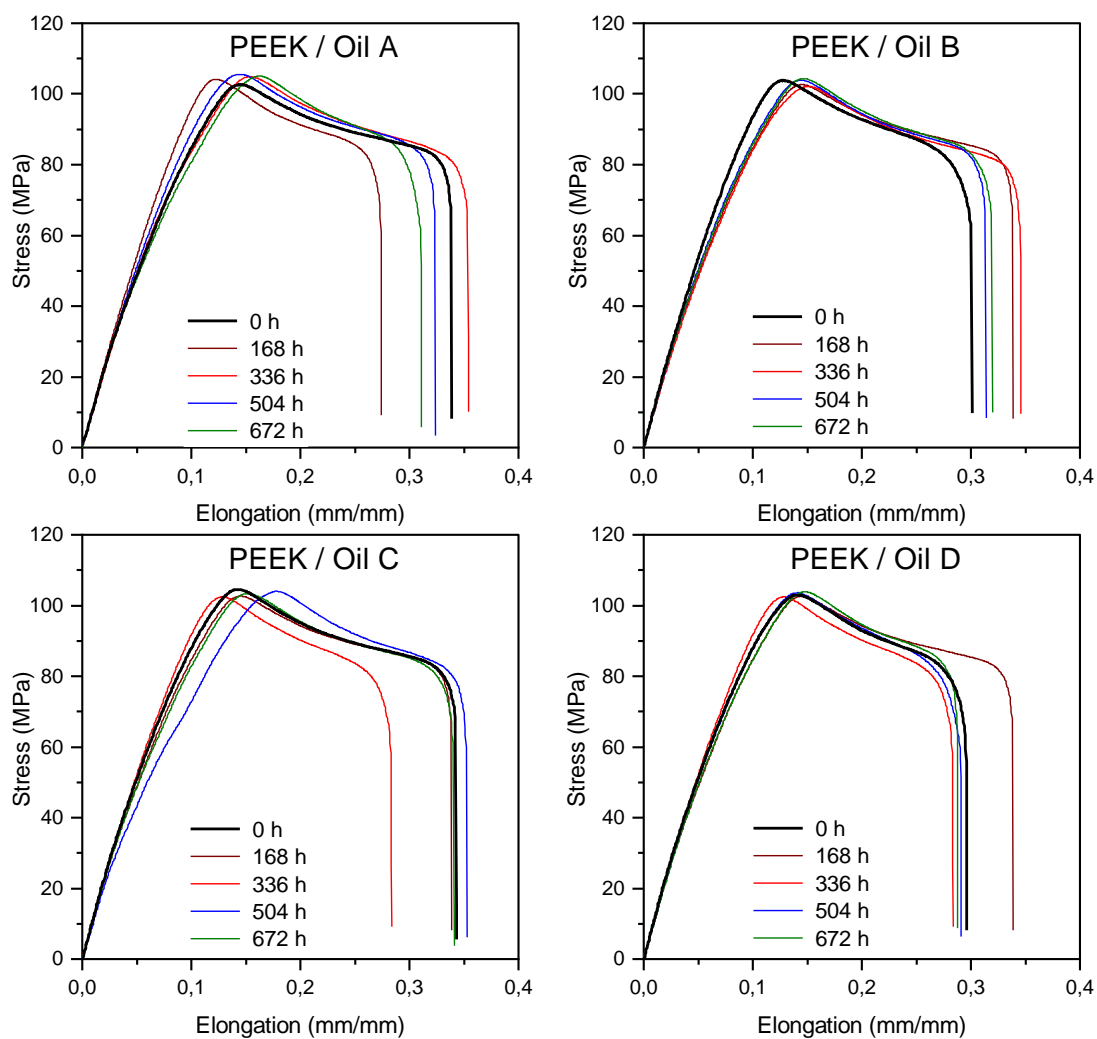

Figure S1. Tensile strength and elongation at break of the PEEK (fresh and after 168, 336, 504 and 672 h of ageing in the ATFs).

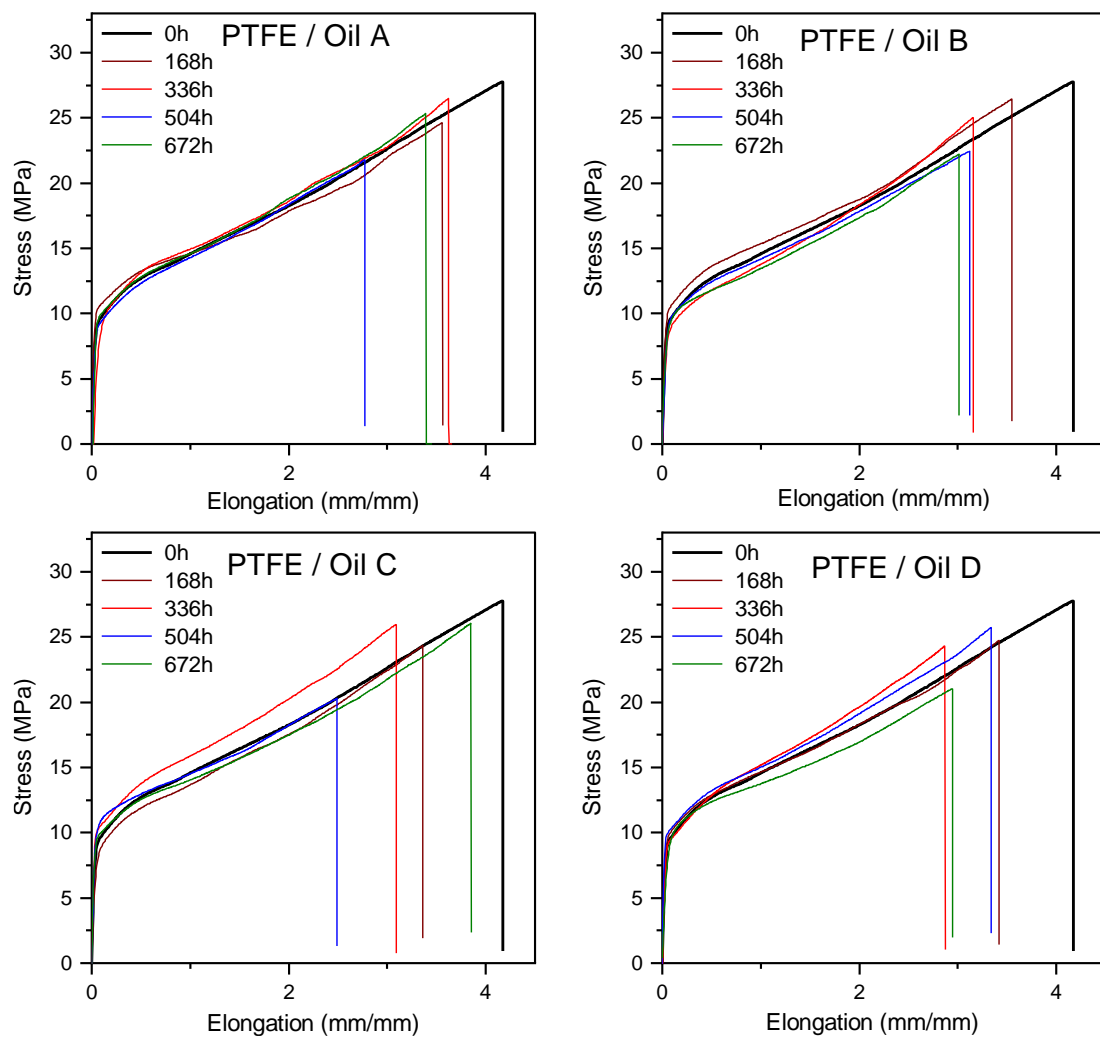

Figure S2. Tensile strength and elongation at break of the PTFE (fresh and after 168, 336, 504 and 672 h of ageing in the ATFs).

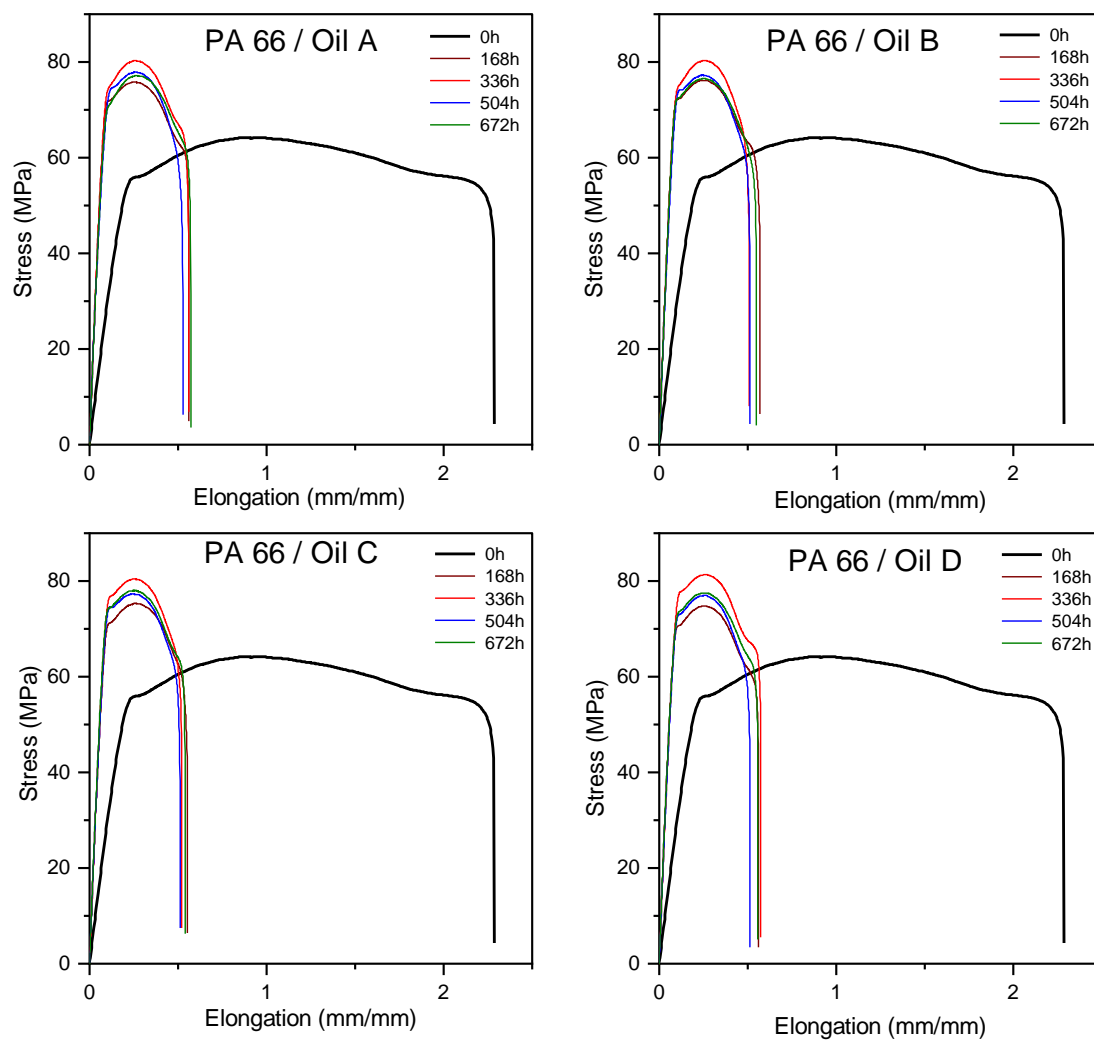

Figure S3. Tensile strength and elongation at break of the PA 66 (fresh and after 168, 336, 504 and 672 h of ageing in the ATFs).

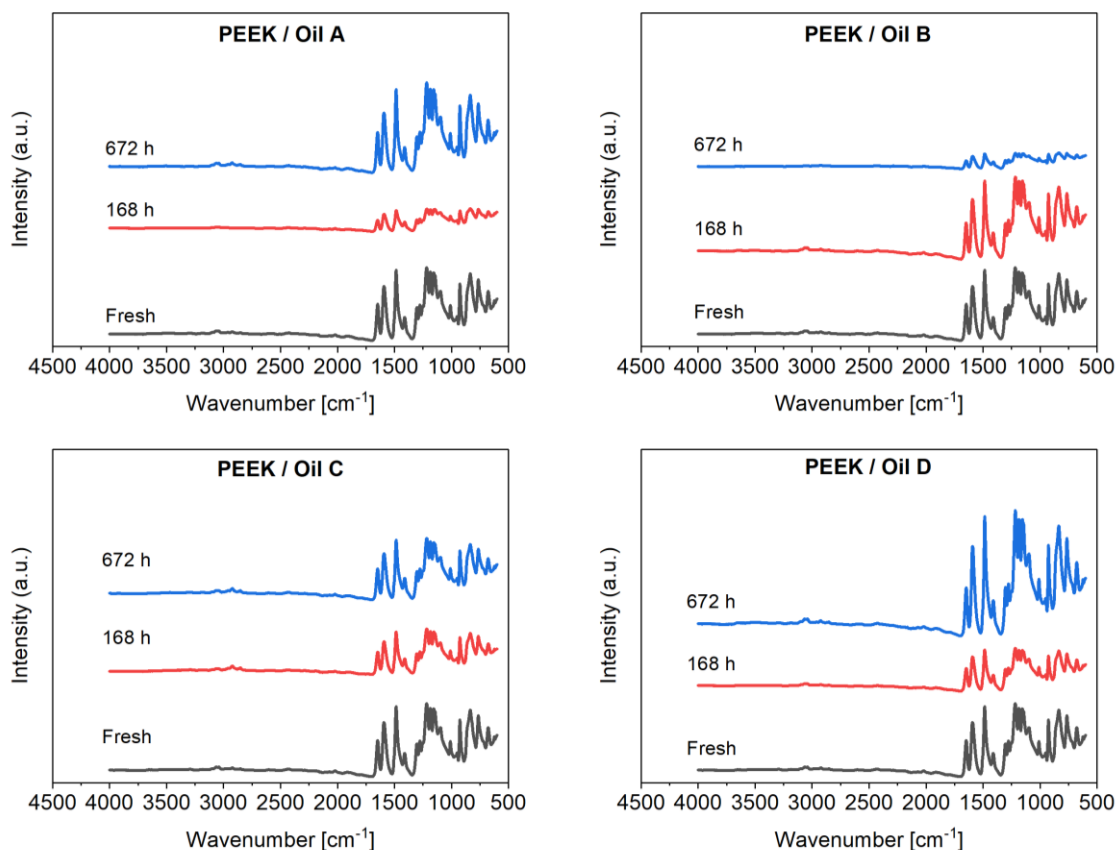

Figure S4. FTIR spectra of the PEEK (fresh and after 168 and 672 h of ageing in the ATFs).

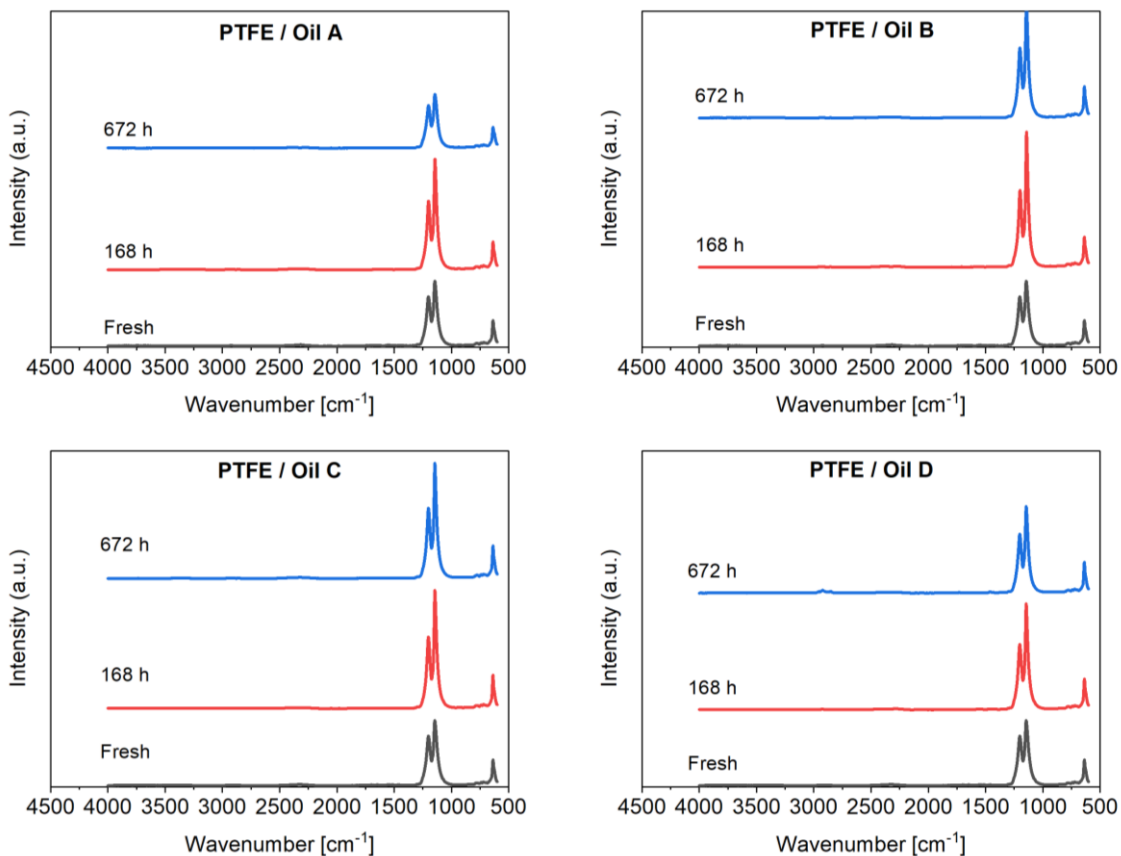

Figure S5. FT-IR spectra of the PTFE (fresh and after 168 and 672 h of ageing in the ATFs).

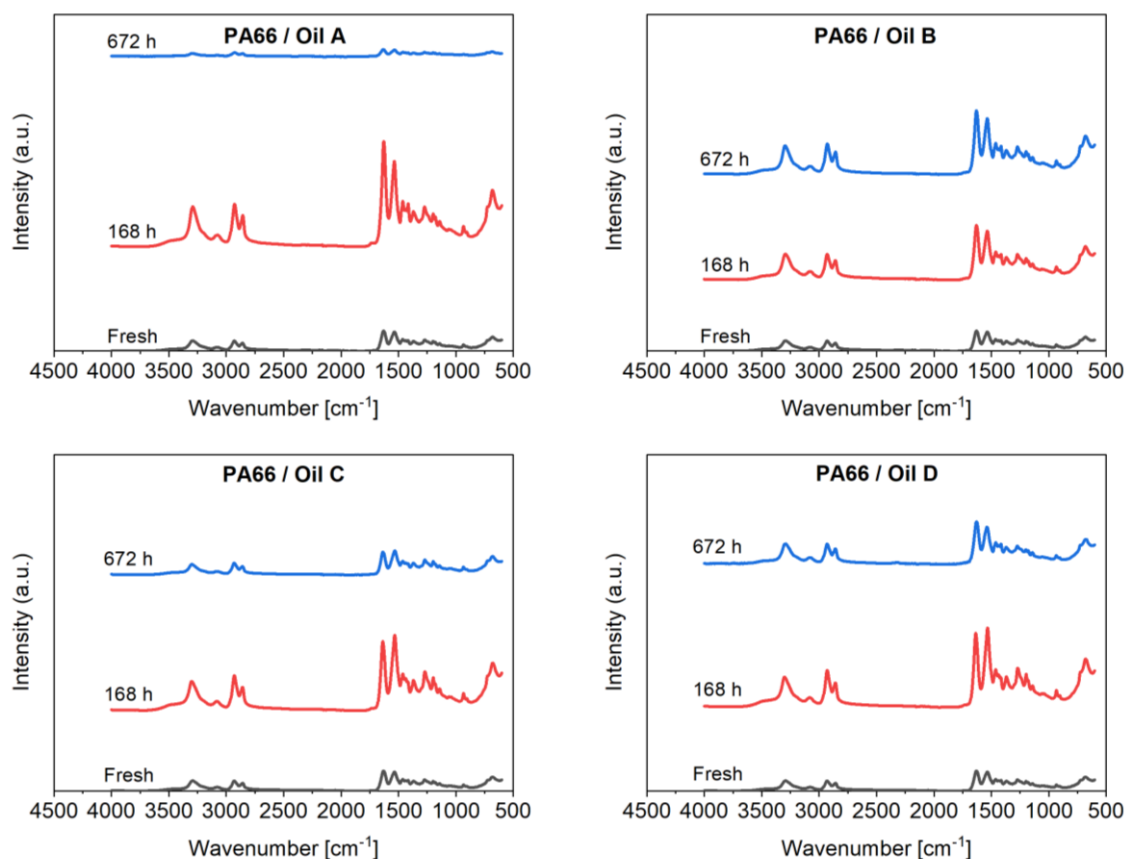

Figure S6. FT-IR spectra of the PA66 (fresh and after 168 and 672 h of ageing in the ATFs).

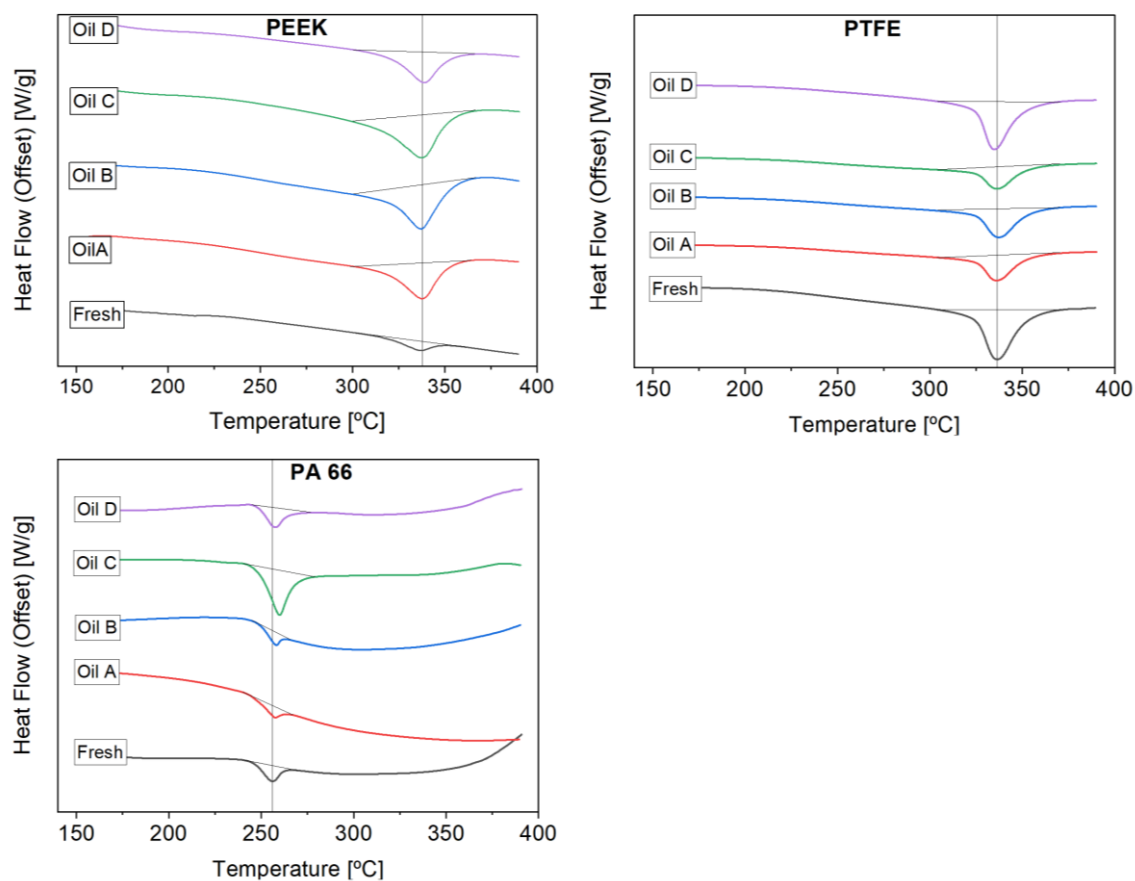

Figure S7. DSC results for the different material/oil combinations (Exo-up).

**Tables S1, S2 and S3. Grubb's statistic for every peak ratio.**  
(we offer the estimation of every G value although it is meaningful only for the highest and lowest values).

Table S1. Grubb's statistic for every peak ratio for PEEK.

| Peak limits / cm <sup>-1</sup> |         | Peak area |            |            |            |            |            |            |            |            |
|--------------------------------|---------|-----------|------------|------------|------------|------------|------------|------------|------------|------------|
| From                           | To      | Fresh     | Oil A/168h | Oil A/672h | Oil B/168h | Oil B/672h | Oil C/168h | Oil C/672h | Oil D/168h | Oil D/672h |
| 651.822                        | 701.962 | 2.4631    | 0.6973     | 2.7784     | 2.5393     | 0.3782     | 1.3084     | 1.8391     | 1.4561     | 3.7724     |
| 701.962                        | 788.743 | 6.0962    | 2.7784     | 7.0903     | 6.3468     | 1.0785     | 3.4472     | 4.7049     | 3.5333     | 9.6063     |
| 788.743                        | 890.952 | 13.2138   | 3.6538     | 15.7539    | 13.9773    | 2.3881     | 7.7012     | 10.5431    | 7.6328     | 21.2228    |
| 890.952                        | 939.164 | 4.1849    | 1.5212     | 4.8946     | 4.8683     | 1.0347     | 2.7359     | 3.6812     | 2.5695     | 6.521      |
| 939.164                        | 979.661 | 0.6719    | 0.285      | 0.7087     | 0.7838     | 0.2058     | 0.4589     | 0.6059     | 0.4381     | 1.1218     |
| 979.661                        | 1020.16 | 1.1202    | 0.4215     | 1.3087     | 1.3542     | 0.2694     | 0.7063     | 0.9694     | 0.7139     | 1.8093     |
| 1020.16                        | 1122.37 | 1.7853    | 0.6138     | 1.9319     | 1.8641     | 0.3192     | 0.8951     | 1.2602     | 1.0551     | 2.9352     |
| 1122.37                        | 1166.72 | 3.4398    | 0.8089     | 4.6683     | 3.8662     | 0.5329     | 1.9936     | 2.7073     | 1.6871     | 6.2532     |
| 1166.72                        | 1197.58 | 1.8108    | 0.4444     | 2.4255     | 2.0291     | 0.3151     | 1.0677     | 1.4895     | 0.8747     | 3.318      |
| 1197.58                        | 1263.15 | 5.3315    | 1.1894     | 7.1644     | 5.4384     | 0.8319     | 3.2843     | 4.2654     | 2.6927     | 8.0704     |
| 1263.15                        | 1290.14 | 0.9149    | 0.3154     | 1.0441     | 1.072      | 0.2334     | 0.5928     | 0.8161     | 0.5661     | 1.4859     |
| 1290.14                        | 1340.28 | 1.5923    | 0.5551     | 1.6899     | 1.7113     | 0.4059     | 0.962      | 1.3373     | 1.015      | 2.3092     |
| 1351.86                        | 1430.92 | 1.8096    | 0.7155     | 1.9518     | 2.0546     | 0.5273     | 1.236      | 1.6902     | 1.231      | 2.6552     |
| 1430.92                        | 1521.56 | 11.5901   | 3.8777     | 13.1767    | 12.9736    | 2.7643     | 7.2279     | 10.1336    | 7.284      | 18.6482    |
| 1521.56                        | 1625.7  | 10.2166   | 3.5811     | 11.0347    | 11.3797    | 2.6191     | 6.2778     | 8.9805     | 6.5949     | 16.293     |
| 1625.7                         | 1689.34 | 4.5536    | 1.4805     | 5.0694     | 4.6751     | 1.0461     | 2.8109     | 3.9225     | 2.8878     | 6.0596     |
| 2813.63                        | 2883.06 | 0.0916    | 0.0133     | 0.1643     | 0.0897     | 0.0379     | 0.2209     | 0.2094     | 0.0609     | 0.1573     |
| 2883.06                        | 2946.7  | 0.1695    | 0.0059     | 0.297      | 0.1471     | 0.0802     | 0.4169     | 0.4115     | 0.0986     | 0.2478     |
| 3014.19                        | 3131.83 | 0.778     | 0.2907     | 0.8507     | 0.9108     | 0.1516     | 0.421      | 0.6364     | 0.5936     | 1.2564     |

Table S2. Grubb's statistic for every peak ratio for PEEK (cont.).

| Peak limits / $\text{cm}^{-1}$ |         | Peak ratio vs fresh sample |            |            |            |            |            |            |            |            |
|--------------------------------|---------|----------------------------|------------|------------|------------|------------|------------|------------|------------|------------|
| From                           | To      | Fresh                      | Oil A/168h | Oil A/672h | Oil B/168h | Oil B/672h | Oil C/168h | Oil C/672h | Oil D/168h | Oil D/672h |
| 651.822                        | 701.962 | 1                          | 0.283      | 1.128      | 1.031      | 0.154      | 0.531      | 0.747      | 0.591      | 1.532      |
| 701.962                        | 788.743 | 1                          | 0.456      | 1.163      | 1.041      | 0.177      | 0.565      | 0.772      | 0.580      | 1.576      |
| 788.743                        | 890.952 | 1                          | 0.277      | 1.192      | 1.058      | 0.181      | 0.583      | 0.798      | 0.578      | 1.606      |
| 890.952                        | 939.164 | 1                          | 0.363      | 1.170      | 1.163      | 0.247      | 0.654      | 0.880      | 0.614      | 1.558      |
| 939.164                        | 979.661 | 1                          | 0.424      | 1.055      | 1.167      | 0.306      | 0.683      | 0.902      | 0.652      | 1.670      |
| 979.661                        | 1020.16 | 1                          | 0.376      | 1.168      | 1.209      | 0.240      | 0.631      | 0.865      | 0.637      | 1.615      |
| 1020.16                        | 1122.37 | 1                          | 0.344      | 1.082      | 1.044      | 0.179      | 0.501      | 0.706      | 0.591      | 1.644      |
| 1122.37                        | 1166.72 | 1                          | 0.235      | 1.357      | 1.124      | 0.155      | 0.580      | 0.787      | 0.490      | 1.818      |
| 1166.72                        | 1197.58 | 1                          | 0.245      | 1.339      | 1.121      | 0.174      | 0.590      | 0.823      | 0.483      | 1.832      |
| 1197.58                        | 1263.15 | 1                          | 0.223      | 1.344      | 1.020      | 0.156      | 0.616      | 0.800      | 0.505      | 1.514      |
| 1263.15                        | 1290.14 | 1                          | 0.345      | 1.141      | 1.172      | 0.255      | 0.648      | 0.892      | 0.619      | 1.624      |
| 1290.14                        | 1340.28 | 1                          | 0.349      | 1.061      | 1.075      | 0.255      | 0.604      | 0.840      | 0.637      | 1.450      |
| 1351.86                        | 1430.92 | 1                          | 0.395      | 1.079      | 1.135      | 0.291      | 0.683      | 0.934      | 0.680      | 1.467      |
| 1430.92                        | 1521.56 | 1                          | 0.335      | 1.137      | 1.119      | 0.239      | 0.624      | 0.874      | 0.628      | 1.609      |
| 1521.56                        | 1625.7  | 1                          | 0.351      | 1.080      | 1.114      | 0.256      | 0.614      | 0.879      | 0.646      | 1.595      |
| 1625.7                         | 1689.34 | 1                          | 0.325      | 1.113      | 1.027      | 0.230      | 0.617      | 0.861      | 0.634      | 1.331      |
| 2813.63                        | 2883.06 | 1                          | 0.145      | 1.794      | 0.979      | 0.414      | 2.412      | 2.286      | 0.665      | 1.717      |
| 2883.06                        | 2946.7  | 1                          | 0.035      | 1.752      | 0.868      | 0.473      | 2.460      | 2.428      | 0.582      | 1.462      |
| 3014.19                        | 3131.83 | 1                          | 0.374      | 1.093      | 1.171      | 0.195      | 0.541      | 0.818      | 0.763      | 1.615      |

Table S3. Grubb's statistic for every peak ratio for PEEK (cont.).

| Peak limits / cm <sup>-1</sup> |         | G values for peak ratio |            |            |            |            |            |            |            |            |
|--------------------------------|---------|-------------------------|------------|------------|------------|------------|------------|------------|------------|------------|
| From                           | To      | Fresh                   | Oil A/168h | Oil A/672h | Oil B/168h | Oil B/672h | Oil C/168h | Oil C/672h | Oil D/168h | Oil D/672h |
| 651.822                        | 701.962 | N.A.                    | 0.26       | 0.45       | 0.67       | 1.02       | 0.46       | 0.51       | 0.27       | 0.49       |
| 701.962                        | 788.743 | N.A.                    | 1.46       | 0.28       | 0.54       | 0.75       | 0.40       | 0.46       | 0.44       | 0.13       |
| 788.743                        | 890.952 | N.A.                    | 0.33       | 0.15       | 0.34       | 0.70       | 0.37       | 0.41       | 0.47       | 0.12       |
| 890.952                        | 939.164 | N.A.                    | 0.54       | 0.25       | 0.93       | 0.07       | 0.25       | 0.24       | 0.07       | 0.27       |
| 939.164                        | 979.661 | N.A.                    | 1.14       | 0.79       | 0.97       | 0.76       | 0.20       | 0.19       | 0.63       | 0.64       |
| 979.661                        | 1020.16 | N.A.                    | 0.67       | 0.26       | 1.48       | 0.00       | 0.29       | 0.27       | 0.42       | 0.20       |
| 1020.16                        | 1122.37 | N.A.                    | 0.34       | 0.66       | 0.51       | 0.73       | 0.51       | 0.60       | 0.27       | 0.43       |
| 1122.37                        | 1166.72 | N.A.                    | 0.74       | 0.62       | 0.46       | 1.00       | 0.37       | 0.43       | 1.76       | 1.86       |
| 1166.72                        | 1197.58 | N.A.                    | 0.64       | 0.54       | 0.42       | 0.78       | 0.36       | 0.35       | 1.87       | 1.98       |
| 1197.58                        | 1263.15 | N.A.                    | 0.86       | 0.56       | 0.80       | 0.99       | 0.31       | 0.40       | 1.55       | 0.64       |
| 1263.15                        | 1290.14 | N.A.                    | 0.35       | 0.38       | 1.03       | 0.17       | 0.26       | 0.21       | 0.14       | 0.27       |
| 1290.14                        | 1340.28 | N.A.                    | 0.39       | 0.76       | 0.14       | 0.16       | 0.33       | 0.32       | 0.42       | 1.16       |
| 1351.86                        | 1430.92 | N.A.                    | 0.86       | 0.68       | 0.59       | 0.59       | 0.20       | 0.12       | 1.05       | 1.02       |
| 1430.92                        | 1521.56 | N.A.                    | 0.25       | 0.40       | 0.40       | 0.03       | 0.30       | 0.25       | 0.29       | 0.14       |
| 1521.56                        | 1625.7  | N.A.                    | 0.41       | 0.67       | 0.33       | 0.18       | 0.31       | 0.24       | 0.54       | 0.03       |
| 1625.7                         | 1689.34 | N.A.                    | 0.16       | 0.51       | 0.72       | 0.13       | 0.31       | 0.27       | 0.37       | 2.14       |
| 2813.63                        | 2883.06 | N.A.                    | 1.64       | 2.65       | 1.29       | 2.02       | 2.79       | 2.67       | 0.83       | 1.03       |
| 2883.06                        | 2946.7  | N.A.                    | 2.74       | 2.46       | 2.63       | 2.71       | 2.87       | 2.96       | 0.41       | 1.06       |
| 3014.19                        | 3131.83 | N.A.                    | 0.64       | 0.61       | 1.02       | 0.54       | 0.44       | 0.36       | 2.28       | 0.19       |

Critic G value (P=0.05, n=19) = 2.68



Table S4. Grubb's statistic for every peak ratio for PTFE.

| Peak limits / cm <sup>-1</sup> |          | Peak area |            |            |            |            |            |            |            |            |
|--------------------------------|----------|-----------|------------|------------|------------|------------|------------|------------|------------|------------|
| From                           | To       | Fresh     | Oil A/168h | Oil A/672h | Oil B/168h | Oil B/672h | Oil C/168h | Oil C/672h | Oil D/168h | Oil D/672h |
| 599.753                        | 680.749  | 6.3302    | 7.0543     | 5.5796     | 7.499      | 7.4539     | 7.7482     | 7.7541     | 7.3355     | 7.1243     |
| 1024.02                        | 1176.37  | 15.1408   | 25.9552    | 12.4736    | 32.1433    | 27.9094    | 27.8658    | 26.2215    | 23.6678    | 20.723     |
| 1176.37                        | 1270.86  | 11.8999   | 16.2183    | 10.5243    | 17.5698    | 16.5984    | 17.3706    | 16.7992    | 15.8825    | 15.1859    |
| 2154.1                         | 25424.36 | 2.5929    | 2.2086     | 1.5066     | 2.3531     | 2.4177     | 2.2636     | 2.5407     | 2.4019     | 2.1923     |
| 2775.06                        | 2879.2   | 0.0265    | 0.0131     | 0.0136     | 0.0192     | 0.0042     | 0.0092     | 0.0151     | 0.0176     | 0.1649     |
| 2879.2                         | 2944.77  | 0.0916    | 0.0504     | 0.0476     | 0.0704     | 0.019      | 0.033      | 0.0639     | 0.06       | 0.5318     |
| 2944.77                        | 3014.19  | -0.0295   | -0.0075    | -0.0128    | -0.0118    | -0.0139    | -0.012     | -0.0186    | -0.0211    | -0.0714    |

| Peak limits / cm <sup>-1</sup> |          | Peak ratio vs fresh sample |            |            |            |            |            |            |            |            |
|--------------------------------|----------|----------------------------|------------|------------|------------|------------|------------|------------|------------|------------|
| From                           | To       | Fresh                      | Oil A/168h | Oil A/672h | Oil B/168h | Oil B/672h | Oil C/168h | Oil C/672h | Oil D/168h | Oil D/672h |
| 599.753                        | 680.749  | 1                          | 1.114      | 0.881      | 1.185      | 1.178      | 1.224      | 1.225      | 1.159      | 1.125      |
| 1024.02                        | 1176.37  | 1                          | 1.714      | 0.824      | 2.123      | 1.843      | 1.840      | 1.732      | 1.563      | 1.369      |
| 1176.37                        | 1270.86  | 1                          | 1.363      | 0.884      | 1.476      | 1.395      | 1.460      | 1.412      | 1.335      | 1.276      |
| 2154.1                         | 25424.36 | 1                          | 0.852      | 0.581      | 0.908      | 0.932      | 0.873      | 0.980      | 0.926      | 0.846      |
| 2775.06                        | 2879.2   | 1                          | 0.494      | 0.513      | 0.725      | 0.158      | 0.347      | 0.570      | 0.664      | 6.223      |
| 2879.2                         | 2944.77  | 1                          | 0.550      | 0.520      | 0.769      | 0.207      | 0.360      | 0.698      | 0.655      | 5.806      |
| 2944.77                        | 3014.19  | 1                          | 0.254      | 0.434      | 0.400      | 0.471      | 0.407      | 0.631      | 0.715      | 2.420      |

| Peak limits / cm <sup>-1</sup> |         | G values for peak ratio |            |            |            |            |            |            |            |            |
|--------------------------------|---------|-------------------------|------------|------------|------------|------------|------------|------------|------------|------------|
| From                           | To      | Fresh                   | Oil A/168h | Oil A/672h | Oil B/168h | Oil B/672h | Oil C/168h | Oil C/672h | Oil D/168h | Oil D/672h |
| 599.753                        | 680.749 | N.A.                    | 0.40       | 1.13       | 0.18       | 0.46       | 0.49       | 0.43       | 0.44       | 0.69       |
| 1024.02                        | 1176.37 | N.A.                    | 1.55       | 0.83       | 1.81       | 1.51       | 1.53       | 1.58       | 1.56       | 0.59       |
| 1176.37                        | 1270.86 | N.A.                    | 0.88       | 1.15       | 0.69       | 0.80       | 0.89       | 0.86       | 0.93       | 0.63       |

|         |          |      |      |      |      |      |      |      |      |      |
|---------|----------|------|------|------|------|------|------|------|------|------|
| 2154.1  | 25424.36 | N.A. | 0.10 | 0.42 | 0.31 | 0.08 | 0.10 | 0.13 | 0.21 | 0.82 |
| 2775.06 | 2879.2   | N.A. | 0.79 | 0.77 | 0.63 | 1.14 | 0.98 | 1.06 | 0.94 | 1.52 |
| 2879.2  | 2944.77  | N.A. | 0.68 | 0.74 | 0.55 | 1.06 | 0.95 | 0.77 | 0.97 | 1.34 |
| 2944.77 | 3014.19  | N.A. | 1.25 | 1.18 | 1.19 | 0.65 | 0.88 | 0.92 | 0.80 | 0.13 |

---

Critic G value (P=0.05. n=7) = 2,02

Table SI-5 Grubb's statistic for every peak ratio for PA 66.

| Peak limits / cm <sup>-1</sup> |         | Peak area |            |            |            |            |            |            |            |            |
|--------------------------------|---------|-----------|------------|------------|------------|------------|------------|------------|------------|------------|
| From                           | To      | Fresh     | Oil A/168h | Oil A/672h | Oil B/168h | Oil B/672h | Oil C/168h | Oil C/672h | Oil D/168h | Oil D/672h |
| 2763.49                        | 2886.92 | 0.4039    | 1.7473     | 0.115      | 0.9902     | 1.1723     | 0.9782     | 0.3522     | 1.0264     | 0.815      |
| 2886.92                        | 2989.12 | 1.6753    | 7.3403     | 0.6729     | 4.3936     | 5.3291     | 6.0282     | 2.0204     | 6.3634     | 3.4839     |
| 3012.27                        | 3131.83 | 0.589     | 1.7547     | 0.1387     | 1.3694     | 1.2937     | 1.4263     | 0.5007     | 1.3905     | 1.096      |
| 3139.54                        | 3396.03 | 4.4043    | 16.5608    | 1.2297     | 11.2557    | 12.0798    | 11.891     | 4.2608     | 12.163     | 9.0534     |

  

| Peak limits / cm <sup>-1</sup> |         | Peak ratio vs fresh sample |            |            |            |            |            |            |            |            |
|--------------------------------|---------|----------------------------|------------|------------|------------|------------|------------|------------|------------|------------|
| From                           | To      | Fresh                      | Oil A/168h | Oil A/672h | Oil B/168h | Oil B/672h | Oil C/168h | Oil C/672h | Oil D/168h | Oil D/672h |
| 2763.49                        | 2886.92 | 1                          | 4.326      | 0.285      | 2.452      | 2.902      | 2.422      | 0.872      | 2.541      | 2.018      |
| 2886.92                        | 2989.12 | 1                          | 4.381      | 0.402      | 2.623      | 3.181      | 3.598      | 1.206      | 3.798      | 2.080      |
| 3012.27                        | 3131.83 | 1                          | 2.979      | 0.235      | 2.325      | 2.196      | 2.422      | 0.850      | 2.361      | 1.861      |
| 3139.54                        | 3396.03 | 1                          | 3.760      | 0.279      | 2.556      | 2.743      | 2.700      | 0.967      | 2.762      | 2.056      |

  

| Peak limits / cm <sup>-1</sup> |         | G values for peak ratio |            |            |            |            |            |            |            |            |
|--------------------------------|---------|-------------------------|------------|------------|------------|------------|------------|------------|------------|------------|
| From                           | To      | Fresh                   | Oil A/168h | Oil A/672h | Oil B/168h | Oil B/672h | Oil C/168h | Oil C/672h | Oil D/168h | Oil D/672h |
| 2763.49                        | 2886.92 | N.A.                    | 0.71       | 0.22       | 0.29       | 0.35       | 0.65       | 0.63       | 0.50       | 0.15       |
| 2886.92                        | 2989.12 | N.A.                    | 0.80       | 1.43       | 1.03       | 1.03       | 1.46       | 1.42       | 1.45       | 0.77       |
| 3012.27                        | 3131.83 | N.A.                    | 1.35       | 0.91       | 1.26       | 1.35       | 0.65       | 0.76       | 0.78       | 1.45       |
| 3139.54                        | 3396.03 | N.A.                    | 0.16       | 0.30       | 0.52       | 0.03       | 0.15       | 0.04       | 0.16       | 0.53       |

Critic G value (P=0.05. n=4) = 1.48
